# Supplementary material
Source: publisher figshare collection journal article supplement (https://frontiersin.figshare.com/ndownloader/files/22818182)
Supplement: Supplementary file [file 22818182]

## *Supplementary Material*

### 1. Components

#### 1.1 Components for the basic UCN block

In the table below, we provide the values of the components used for the basic UCN circuit that is shown in Fig. 1.

| Component       | Value (simulated circuit)  | Value (implemented circuit) |
|-----------------|----------------------------|-----------------------------|
| SCR             | custom model (see methods) | CR02A                       |
| T1              | IRLML6246                  | IRLML6246                   |
| T2              | BSS84                      | ZVP3310A                    |
| D <sub>IN</sub> | 1N4148                     | 1N4148                      |
| C1              | 15nF                       | 15nF                        |
| R1              | 68k $\Omega$               | 68k $\Omega$                |
| R2              | 390k $\Omega$              | 390k $\Omega$               |
| R3              | 1.5k $\Omega$              | 1.5k $\Omega$               |
| R4              | 10k $\Omega$               | 10k $\Omega$                |
| R5              | 4.7k $\Omega$              | 4.7k $\Omega$               |
| R <sub>IN</sub> | 1.5k $\Omega$              | 1.5k $\Omega$               |

**Supplementary Table 1.** List of components for circuits simulated with the LTspice and implemented, corresponding to the data of Fig.1 of Main Text.

#### 1.2 Components for the numerically simulated circuits

In the table below, we provide the values of the components used for each one of the circuit variants that are shown in Fig.3 of Main Text.

| Component | Panel of Fig.3 (main text) | Value                      |
|-----------|----------------------------|----------------------------|
| SCR       | a, b, c                    | Custom model (see Methods) |
| T1        | a, b                       | IRLML6246                  |
| T1        | c                          | standard model (BSS84)     |
| T2        | a, b                       | standard model (BSS84)     |
| T3        | b                          | IRLML6246                  |
| D1        | b                          | standard model (1N4148)    |
| C1        | a (phasic spiking)         | 3nF                        |
| C1        | a (phasic bursting)        | 3nF                        |
| C1        | a (mixed mode)             | 5nF                        |
| C1        | b                          | 10nF                       |
| C1        | c                          | 1nF                        |
| C2        | a (phasic spiking)         | 5nF                        |
| C2        | a (phasic bursting)        | 15nF                       |

|    |                     |               |
|----|---------------------|---------------|
| C2 | a (mixed mode)      | 17nF          |
| C3 | b                   | 20nF          |
| R1 | a (phasic spiking)  | 50k $\Omega$  |
| R1 | a (phasic bursting) | 50k $\Omega$  |
| R1 | a (mixed mode)      | 40k $\Omega$  |
| R1 | b                   | 40k $\Omega$  |
| R1 | c                   | 100k $\Omega$ |
| R2 | a (phasic spiking)  | 300k $\Omega$ |
| R2 | a (phasic bursting) | 300k $\Omega$ |
| R2 | a (mixed mode)      | 30k $\Omega$  |
| R2 | b                   | 40k $\Omega$  |
| R2 | c                   | 100k $\Omega$ |
| R3 | a (phasic spiking)  | 1.5k $\Omega$ |
| R3 | a (phasic bursting) | 1.5k $\Omega$ |
| R3 | a (mixed mode)      | 1k $\Omega$   |
| R3 | b                   | 0.5k $\Omega$ |
| R3 | c                   | 3k $\Omega$   |
| R4 | a (phasic spiking)  | 10k $\Omega$  |
| R4 | a (phasic bursting) | 10k $\Omega$  |
| R4 | a (mixed mode)      | 50k $\Omega$  |
| R4 | b                   | 10k $\Omega$  |
| R4 | c                   | 20k $\Omega$  |
| R5 | a                   | 10k $\Omega$  |
| R5 | b                   | 5k $\Omega$   |
| R6 | a                   | 30k $\Omega$  |
| R7 | a (phasic spiking)  | none          |
| R7 | a (phasic bursting) | none          |
| R7 | a (mixed mode)      | 11k $\Omega$  |
| R8 | b                   | 20k $\Omega$  |
| R9 | b                   | 300k $\Omega$ |

**Supplementary Table 2.** List of components for circuits simulated with the LTspice code that realize the spiking behaviors shown in Fig.2 of the main text (circuits are in Fig.3).

### 1.3 Components for the actually implemented circuits

In the table below, we provide the values of the components used for each one of the circuit variants that are shown in Sup. Fig. 2.

| Component | Panel of Fig.5 (main text) | Value   |
|-----------|----------------------------|---------|
| SCR       | a, b, c, d, e              | P0118MA |
| T1        | a, b, c, d                 | 2N3904  |
| T1        | e                          | 2N3906  |

|    |               |                                 |
|----|---------------|---------------------------------|
| T2 | a, b, c, d, e | ZVP3310A                        |
| T3 | c             | ZVN0124A                        |
| T4 | d             | ZVN0124A                        |
| D1 | b             | 1N4148                          |
| D2 | c             | 1N4148                          |
| C1 | a, b, c, d, e | 10nF                            |
| C2 | b             | 47nF                            |
| C3 | c             | 100nF                           |
| C4 | d             | 100nF                           |
| R1 | a, b, c, d, e | 500k $\Omega$ (25-turn trimmer) |
| R2 | a, b, c, d, e | 2k $\Omega$                     |
| R3 | a, b, c, d, e | 100k $\Omega$                   |
| R4 | a, b, d, e    | 100k $\Omega$                   |
| R4 | c             | 100k $\Omega$ (25-turn trimmer) |
| R5 | b             | 100k $\Omega$                   |
| R6 | c             | 100k $\Omega$                   |
| R7 | d             | 100k $\Omega$ (25-turn trimmer) |

**Supplementary Table 3.** List of components for the actual circuits that were implemented and measured to obtain the spiking behaviors shown in Fig.4 of the Main Text (circuits are in Fig.5)

## 2. Details on the actual circuit implementation and measurements

One main difference between the simulated and the implemented circuits is the transistor  $T_1$  (Fig.5 in the Main Text) sensing the voltage at the SCR cathode. We envisage the use of a low-threshold NMOS transistor, as done in the simulations. However, we were not able to get it commercially in a no-SMD package. Therefore, in the actual circuit implementation we adopted for  $T_1$  a standard NPN transistor.

In some circuits we replaced the simulated resistor by a trimmer resistor. This was done solely for practical convenience.

There are also differences in the implementations of the actual circuit and the simulation one in the case of mixed mode behavior [see in Main Text panel (b) of Fig.3 and panel (d) of Fig.5]. Both circuits are actually valid solutions. We nevertheless favored the chosen circuit implementation as we find it less demanding to the input signal generator.

The measurements were done using a National Instrument PCIe-6343 Multifunction I/O Device (ADQ board with 32 AI (16-Bit, 500 kS/s), 4 AO (900 kS/s), and 48 DIO Multifunction I/O). We also developed an ad-hoc ADQ software based on National Instrument LabVIEW. Since the output of the PCIe-6343 are voltage outputs, we implemented a V-to-I converter based on an Analog Devices LT1168 Instrumentation Amplifier. We also buffered the analog inputs using Texas Instruments TL084 Operational Amplifiers.

### 3. LTSpice model for the SCR

```

.SUBCKT EC103D1      1      2      3
*      TERMINALS:    A      G      K
Qpnp      6      4      1      Pfor      OFF
Qnpn      4      6      5      Nfor              OFF
Rfor      6      4      5G
Rrev      1      4      5G
Rshort     6      5      1MEG
Rlat      2      6      9.09
Ron       3      5      513.4m
Dfor      6      4      Zbrk
Drev      1      4      Zbrk
Dgate     6      5      Zgate
.MODEL     Zbrk      D      (IS=3.2E-16 IBV=100U BV=400)
.MODEL     Zgate     D      (IS=1E-16 IBV=100U BV=10 VJ=0.3)
.MODEL     Pfor      PNP    (IS=5E-15 BF=2.90 CJE=5p CJC=2p TF=0.3U)
.MODEL     Nfor      NPN    (IS=1E-12 ISE=1E-9 BF=10.0 RC=0.45 CJE=30p CJC=2p TF=0.3U)
.ENDS

```
